# Supplementary material for: Expression Profile of mRNAs and miRNAs Related to the Oxidative-Stress Phenomenon in the Ishikawa Cell Line Treated Either Cisplatin or Salinomycin
Source: MDPI journal article supplement (doi:10.3390/biomedicines10051190), 2022-05-20
Supplement: s1 [file s1]

**Table S1.** List of all the mRNAs (significantly differentiated;  $p < 0.05$ ) cell culture treated with cisplatin in comparison to a control culture.

| H_12 vs C   |           |             |         | H_24 vs C   |           |             |         | H_48 vs C   |         |             |         |
|-------------|-----------|-------------|---------|-------------|-----------|-------------|---------|-------------|---------|-------------|---------|
| ID          | Gene      | Fold Change | up/down | ID          | Gene      | Fold Change | up/down | ID          | Gene    | Fold Change | up/down |
| 222151_s_at | CEP63     | -13.36      | down    | 202708_s_at | HIST2H2BE | -12.54      | down    | 203151_at   | MAP1A   | -9.77       | down    |
| 221926_s_at | IL17RC    | -12.06      | down    | 1053_at     | RFC2      | -6.70       | down    | 205197_s_at | ATP7A   | -6.73       | down    |
| 220451_s_at | BIRC7     | -7.70       | down    | 205568_at   | AQP9      | -6.33       | down    | 203148_s_at | TRIM14  | -6.51       | down    |
| 221188_s_at | CIDEB     | -7.39       | down    | 209460_at   | ABAT      | -6.25       | down    | 205126_at   | VRK2    | -5.30       | down    |
| 220525_s_at | AUP1      | -6.19       | down    | 209375_at   | XPC       | -6.00       | down    | 207528_s_at | SLC7A11 | -5.17       | down    |
| 200714_x_at | OS9       | -5.86       | down    | 205567_at   | CHST1     | -5.76       | down    | 209921_at   | SLC7A11 | -5.11       | down    |
| 201106_at   | GPX4      | -5.82       | down    | 202655_at   | MANF      | -5.39       | down    | 205151_s_at | TRIL    | -4.61       | down    |
| 200668_s_at | UBE2D3    | -5.76       | down    | 209383_at   | DDIT3     | -5.20       | down    | 200892_s_at | TRA2B   | -4.07       | down    |
| 221556_at   | CDC14B    | -5.55       | down    | 202716_at   | PTPN1     | -5.04       | down    | 205098_at   | CCR1    | -3.81       | down    |
| 203717_at   | DPP4      | -5.41       | down    | 202723_s_at | FOXO1     | -5.02       | down    | 203088_at   | FBLN5   | -3.70       | down    |
| 201498_at   | USP7      | -5.40       | down    | 202660_at   | ITPR2     | -4.90       | down    | 203147_s_at | TRIM14  | -3.51       | down    |
| 221552_at   | ABHD6     | -5.38       | down    | 202644_s_at | TNFAIP3   | -4.88       | down    | 201405_s_at | COPS6   | -3.49       | down    |
| 200742_s_at | TPP1      | -5.38       | down    | 209459_s_at | ABAT      | -4.87       | down    | 205141_at   | ANG     | -3.44       | down    |
| 201537_s_at | DUSP3     | -5.34       | down    | 209364_at   | BAD       | -3.71       | down    | 203149_at   | PVRL2   | -3.36       | down    |
| 221555_x_at | CDC14B    | -5.27       | down    | 202652_at   | APBB1     | -3.44       | down    | 203085_s_at | TGFB1   | -3.14       | down    |
| 201107_s_at | THBS1     | -5.26       | down    | 209361_s_at | PCBP4     | -2.60       | down    | 202859_x_at | CXCL8   | -3.10       | down    |
| 201538_s_at | DUSP3     | -5.23       | down    | 209368_at   | EPHX2     | -2.47       | down    | 221271_at   | IL21    | -3.07       | down    |
| 201536_at   | DUSP3     | -5.11       | down    | 209357_at   | CITED2    | -2.35       | down    | 203047_at   | STK10   | -3.04       | down    |
| 203688_at   | PKD2      | -4.80       | down    | 202642_s_at | TRRAP     | 1.92        | up      | 205128_x_at | PTGS1   | -2.94       | down    |
| 201272_at   | AKR1B1    | -4.74       | down    | 209404_s_at | TMED7     | 1.94        | up      | 203050_at   | TP53BP1 | -2.88       | down    |
| 1431_at     | 20.00 CYP | -4.48       | down    | 209414_at   | FZR1      | 1.95        | up      | 205198_s_at | ATP7A   | -2.85       | down    |

|             |         |       |      |             |          |      |    |             |                                          |       |      |
|-------------|---------|-------|------|-------------|----------|------|----|-------------|------------------------------------------|-------|------|
| 201208_s_at | TNFAIP1 | -4.24 | down | 205593_s_at | PDE9A    | 2.19 | up | 203089_s_at | HTRA2                                    | -2.83 | down |
| 200824_at   | GSTP1   | -4.19 | down | 209453_at   | SLC9A1   | 2.23 | up | 205189_s_at | FANCC                                    | -2.76 | down |
| 201164_s_at | PUM1    | -4.00 | down | 209349_at   | RAD50    | 2.24 | up | 205099_s_at | CCR1                                     | -2.32 | down |
| 222233_s_at | DCLRE1C | -3.84 | down | 209416_s_at | FZR1     | 2.29 | up | 205150_s_at | TRIL                                     | -2.18 | down |
| 200924_s_at | SLC3A2  | -3.75 | down | 209432_s_at | CREB3    | 2.37 | up | 203111_s_at | PTK2B                                    | 1.70  | up   |
| 200930_s_at | VCL     | -3.55 | down | 203888_at   | THBD     | 2.40 | up | 205026_at   | STAT5B                                   | 1.77  | up   |
| 201489_at   | PPIF    | -3.40 | down | 209421_at   | MSH2     | 2.41 | up | 205083_at   | AOX1                                     | 1.85  | up   |
| 56748_at    | TRIM10  | -3.36 | down | 209396_s_at | CHI3L1   | 2.51 | up | 201422_at   | IFI30                                    | 1.90  | up   |
| 200810_s_at | CIRBP   | -3.33 | down | 209451_at   | TANK     | 2.58 | up | 205158_at   | RNASE4                                   | 2.04  | up   |
| 201188_s_at | ITPR3   | -3.33 | down | 209456_s_at | FBXW11   | 2.61 | up | 205050_s_at | MAPK8IP2                                 | 2.08  | up   |
| 201161_s_at | YBX3    | -3.11 | down | 202637_s_at | ICAM1    | 2.66 | up | 203061_s_at | 1.00 MDC                                 | 2.24  | up   |
| 201300_s_at | PRNP    | -3.07 | down | 205566_at   | ABHD2    | 2.66 | up | 205040_at   | ORM1                                     | 2.25  | up   |
| 221356_x_at | P2RX2   | -3.05 | down | 209417_s_at | IFI35    | 2.66 | up | 203081_at   | CTNNBIP1                                 | 2.27  | up   |
| 45288_at    | ABHD6   | -2.92 | down | 203824_at   | TSPAN8   | 2.74 | up | 205014_at   | FGFBP1                                   | 2.29  | up   |
| 41858_at    | PGAP2   | -2.85 | down | 207113_s_at | TNF      | 2.81 | up | 205022_s_at | FOXN3                                    | 2.42  | up   |
| 221169_s_at | HRH4    | -2.84 | down | 202672_s_at | ATF3     | 2.81 | up | 209020_at   | OSER1                                    | 2.48  | up   |
| 201242_s_at | ATP1B1  | -2.77 | down | 209435_s_at | ARHGEF2  | 2.82 | up | 201415_at   | GSS                                      | 2.49  | up   |
| 221372_s_at | P2RX2   | -2.75 | down | 202724_s_at | FOXO1    | 2.97 | up | 203040_s_at | HMBS                                     | 2.50  | up   |
| 200943_at   | HMG1    | -2.71 | down | 205550_s_at | BRE      | 2.97 | up | 203110_at   | PTK2B                                    | 2.53  | up   |
| 203809_s_at | AKT2    | -2.61 | down | 203837_at   | MAP3K5   | 2.99 | up | 203084_at   | TGFB1                                    | 2.59  | up   |
| 203706_s_at | FZD7    | -2.56 | down | 209443_at   | SERPINA5 | 3.01 | up | 203074_at   | ANXA8 ///<br>ANXA8L1<br>///<br>LINC00842 | 2.69  | up   |
| 201105_at   | LGALS1  | -2.27 | down | 209407_s_at | DEAF1    | 3.03 | up | 205075_at   | SERPINF2                                 | 2.70  | up   |
| 201286_at   | SDC1    | -2.25 | down | 209415_at   | FZR1     | 3.06 | up | 203109_at   | UBE2M                                    | 2.72  | up   |

|             |                                                                                                                                                                                              |       |      |             |               |      |    |             |                                  |      |    |
|-------------|----------------------------------------------------------------------------------------------------------------------------------------------------------------------------------------------|-------|------|-------------|---------------|------|----|-------------|----------------------------------|------|----|
| 201187_s_at | ITPR3                                                                                                                                                                                        | -2.07 | down | 207151_at   | ADCYAP1R<br>1 | 3.07 | up | 205170_at   | STAT2                            | 2.74 | up |
| 203705_s_at | FZD7                                                                                                                                                                                         | -2.05 | down | 209406_at   | BAG2          | 3.08 | up | 209029_at   | COPS7A                           | 2.79 | up |
| 201293_x_at | PPIA                                                                                                                                                                                         | -1.97 | down | 203900_at   | SZT2          | 3.11 | up | 205033_s_at | DEFA1 ///<br>DEFA1B<br>/// DEFA3 | 2.82 | up |
| 201437_s_at | EIF4E                                                                                                                                                                                        | 1.79  | up   | 207160_at   | IL12A         | 3.14 | up | 203052_at   | C2                               | 2.82 | up |
|             | HLA-<br>DQB1 ///<br>HLA-<br>DRB1 ///<br>HLA-<br>DRB2 ///<br>HLA-<br>DRB3 ///<br>HLA-<br>DRB4 ///<br>HLA-<br>DRB5 ///<br>HLA-<br>DRB6 ///<br>HLA-<br>DRB7 ///<br>HLA-<br>DRB8 ///<br>LOC10536 |       |      |             |               |      |    |             |                                  |      |    |
| 221491_x_at | 9230                                                                                                                                                                                         | 2.13  | up   | 205582_s_at | GGT5          | 3.45 | up | 205162_at   | ERCC8                            | 2.85 | up |
| 221470_s_at | IL37                                                                                                                                                                                         | 2.15  | up   | 202638_s_at | ICAM1         | 3.51 | up | 203041_s_at | LAMP2                            | 2.88 | up |
| 221406_s_at | MSH5-<br>SAPCD1<br>///<br>SAPCD1                                                                                                                                                             | 2.21  | up   | 203922_s_at | CYBB          | 3.53 | up | 203046_s_at | TIMELESS                         | 2.89 | up |

|             |                                                                    |      |    |             |                  |      |    |             |          |      |    |
|-------------|--------------------------------------------------------------------|------|----|-------------|------------------|------|----|-------------|----------|------|----|
| 221518_s_at | USP47                                                              | 2.24 | up | 203868_s_at | VCAM1            | 3.66 | up | 205021_s_at | FOXN3    | 2.93 | up |
| 221539_at   | EIF4EBP1                                                           | 2.26 | up | 207209_at   | CETN1            | 3.68 | up | 205169_at   | RBBP5    | 2.94 | up |
| 201435_s_at | EIF4E                                                              | 2.28 | up | 209458_x_at | HBA1 ///<br>HBA2 | 3.70 | up | 202214_s_at | CUL4B    | 2.97 | up |
| 201153_s_at | MBNL1                                                              | 2.35 | up | 203915_at   | CXCL9            | 3.72 | up | 202181_at   | SUSD6    | 2.98 | up |
| 201455_s_at | NPEPPS                                                             | 2.37 | up | 203887_s_at | THBD             | 3.80 | up | 205032_at   | ITGA2    | 3.02 | up |
| 201372_s_at | CUL3                                                               | 2.38 | up | 207137_at   | TONSL            | 3.94 | up | 205081_at   | CRIP1    | 3.05 | up |
| 201427_s_at | SEPP1                                                              | 2.42 | up | 209354_at   | TNFRSF14         | 3.96 | up | 203124_s_at | SLC11A2  | 3.07 | up |
| 221381_s_at | MORF4L1                                                            | 2.42 | up | 205577_at   | PYGM             | 3.98 | up | 209037_s_at | EHD1     | 3.09 | up |
| 1405_i_at   | CCL5                                                               | 2.42 | up | 209429_x_at | EIF2B4           | 4.04 | up | 203125_x_at | SLC11A2  | 3.15 | up |
| 221540_x_at | GTF2H2<br>///<br>GTF2H2B<br>///<br>GTF2H2C<br>///<br>GTF2H2C<br>_2 | 2.48 | up | 202702_at   | TRIM26           | 4.10 | up | 203060_s_at | PAPSS2   | 3.22 | up |
| 220868_s_at | SLC7A10                                                            | 2.55 | up | 207133_x_at | ALPK1            | 4.25 | up | 202213_s_at | CUL4B    | 3.24 | up |
| 221170_at   | HRH4                                                               | 2.62 | up | 203845_at   | KAT2B            | 4.25 | up | 203045_at   | NINJ1    | 3.33 | up |
| 201319_at   | MYL12A                                                             | 2.64 | up | 207196_s_at | TNIP1            | 4.29 | up | 209035_at   | MDK      | 3.35 | up |
| 201384_s_at | NBR1                                                               | 2.65 | up | 207163_s_at | AKT1             | 4.31 | up | 205082_s_at | AOX1     | 3.38 | up |
| 38710_at    | OTUB1                                                              | 2.66 | up | 207175_at   | ADIPOQ           | 4.33 | up | 215485_s_at | ICAM1    | 3.41 | up |
| 220707_s_at | FOXRED2                                                            | 2.74 | up | 117_at      | HSPA6            | 4.54 | up | 205179_s_at | ADAM8    | 3.42 | up |
| 203684_s_at | BCL2                                                               | 2.75 | up | 205579_at   | HRH1             | 4.56 | up | 203062_s_at | 1.00 MDC | 3.47 | up |
| 203725_at   | GADD45<br>A                                                        | 2.79 | up | 202662_s_at | ITPR2            | 4.57 | up | 209018_s_at | PINK1    | 3.51 | up |
| 200893_at   | TRA2B                                                              | 2.83 | up | 209341_s_at | IKBKB            | 4.63 | up | 205127_at   | PTGS1    | 3.55 | up |
| 201370_s_at | CUL3                                                               | 2.87 | up | 203879_at   | PIK3CD           | 4.73 | up | 209019_s_at | PINK1    | 3.57 | up |

|             |              |      |    |             |                       |      |    |             |                  |      |    |
|-------------|--------------|------|----|-------------|-----------------------|------|----|-------------|------------------|------|----|
| 200006_at   | PARK7        | 2.92 | up | 209431_s_at | PATZ1                 | 4.77 | up | 203059_s_at | PAPSS2           | 3.63 | up |
| 201101_s_at | BCLAF1       | 2.99 | up | 202643_s_at | TNFAIP3               | 4.79 | up | 203058_s_at | PAPSS2           | 3.84 | up |
| 200956_s_at | SSRP1        | 3.05 | up | 202661_at   | ITPR2                 | 4.81 | up | 205091_x_at | RECQL            | 3.84 | up |
| 201109_s_at | THBS1        | 3.05 | up | 207188_at   | CDK3 ///<br>TEN1-CDK3 | 4.82 | up | 209021_x_at | ATG13            | 3.88 | up |
| 200064_at   | HSP90AB<br>1 | 3.08 | up | 203836_s_at | MAP3K5                | 4.84 | up | 209039_x_at | EHD1             | 3.94 | up |
| 220651_s_at | MCM10        | 3.11 | up | 209390_at   | TSC1                  | 4.87 | up | 203142_s_at | AP3B1            | 3.97 | up |
| 201436_at   | EIF4E        | 3.12 | up | 209455_at   | FBXW11                | 4.94 | up | 203123_s_at | SLC11A2          | 4.02 | up |
| 203602_s_at | ZBTB17       | 3.15 | up | 205557_at   | BPI                   | 4.98 | up | 205041_s_at | ORM1 ///<br>ORM2 | 4.05 | up |
| 200920_s_at | BTG1         | 3.16 | up | 205581_s_at | NOS3                  | 5.11 | up | 205045_at   | AKAP10           | 4.15 | up |
| 203659_s_at | TRIM13       | 3.19 | up | 203870_at   | USP46                 | 5.27 | up | 203063_at   | PPM1F            | 4.15 | up |
| 221125_s_at | KCNMB3       | 3.20 | up | 209389_x_at | DBI                   | 5.34 | up | 205060_at   | PARG             | 4.22 | up |
| 200955_at   | IMMT         | 3.22 | up | 203921_at   | CHST2                 | 5.44 | up | 201423_s_at | CUL4A            | 4.41 | up |
| 200862_at   | DHCR24       | 3.34 | up | 209327_s_at | NOP16                 | 5.70 | up | 205087_at   | RWDD3            | 4.69 | up |
| 201006_at   | PRDX2        | 3.41 | up | 203872_at   | ACTA1                 | 5.71 | up | 202188_at   | NUP93            | 4.77 | up |
| 200757_s_at | CALU         | 3.43 | up | 209323_at   | PRKRIR                | 5.76 | up | 203037_s_at | MTSS1            | 4.84 | up |
| 37793_r_at  | RAD51D       | 3.48 | up | 207158_at   | APOBEC1               | 5.81 | up | 202176_at   | ERCC3            | 4.86 | up |
| 201495_x_at | MYH11        | 3.73 | up | 207134_x_at | TPSAB1 ///<br>TPSB2   | 5.92 | up | 203036_s_at | MTSS1            | 5.28 | up |
| 41220_at    | SEPT9        | 3.73 | up | 207145_at   | MSTN                  | 5.93 | up | 205180_s_at | ADAM8            | 5.48 | up |
| 203720_s_at | ERCC1        | 3.94 | up | 203828_s_at | IL32                  | 5.93 | up | 203028_s_at | CYBA             | 5.57 | up |
| 201461_s_at | MAPKAP<br>K2 | 3.95 | up | 203809_s_at | AKT2                  | 6.03 | up | 209038_s_at | EHD1             | 5.79 | up |
| 201460_at   | MAPKAP<br>K2 | 4.02 | up | 205586_x_at | VGF                   | 6.15 | up | 205023_at   | RAD51            | 6.17 | up |
| 64440_at    | IL17RC       | 4.06 | up | 203917_at   | CXADR                 | 6.31 | up | 205024_s_at | RAD51            | 6.70 | up |
| 211506_s_at | CXCL8        | 4.08 | up | 203843_at   | RPS6KA3               | 6.36 | up | 203042_at   | LAMP2            | 7.34 | up |

|             |                            |      |    |             |          |          |    |             |        |       |    |
|-------------|----------------------------|------|----|-------------|----------|----------|----|-------------|--------|-------|----|
| 202859_x_at | CXCL8                      | 4.11 | up | 203811_s_at | DNAJB4   | 6.59     | up | 203141_s_at | AP3B1  | 9.47  | up |
| 201496_x_at | MYH11                      | 4.12 | up | 203925_at   | GCLM     | 6.68     | up | 205027_s_at | MAP3K8 | 14.11 | up |
| 201310_s_at | NREP                       | 4.13 | up | 209337_at   | PSIP1    | 6.80     | up |             |        |       |    |
| 201044_x_at | DUSP1                      | 4.27 | up | 203857_s_at | PDIA5    | 6.84     | up |             |        |       |    |
| 203655_at   | XRCC1                      | 4.27 | up | 203854_at   | CFI      | 6.91     | up |             |        |       |    |
| 203648_at   | TATDN2                     | 4.29 | up | 205576_at   | SERPIND1 | 7.04     | up |             |        |       |    |
| 221627_at   | TRIM10                     | 4.32 | up | 205572_at   | ANGPT2   | 7.08     | up |             |        |       |    |
| 203786_s_at | TPD52L1                    | 4.37 | up | 202666_s_at | ACTL6A   | 7.21     | up |             |        |       |    |
| 200997_at   | RBM14-<br>RBM4 ///<br>RBM4 | 4.40 | up | 202696_at   | OXSRI    | 7.38     | up |             |        |       |    |
| 200851_s_at | IST1                       | 4.52 | up | 202670_at   | MAP2K1   | 7.39     | up |             |        |       |    |
| 38290_at    | RGS14                      | 4.73 | up | 203810_at   | DNAJB4   | 7.64     | up |             |        |       |    |
| 201058_s_at | MYL9                       | 4.83 | up | 209344_at   | TPM4     | 7.94     | up |             |        |       |    |
| 37012_at    | CAPZB                      | 4.87 | up | 203923_s_at | CYBB     | 8.32     | up |             |        |       |    |
| 823_at      | CX3CL1                     | 4.87 | up | 209395_at   | CHI3L1   | 8.39     | up |             |        |       |    |
| 201064_s_at | PABPC4                     | 4.97 | up | 209322_s_at | SH2B1    | 9.16     | up |             |        |       |    |
| 203601_s_at | ZBTB17                     | 5.01 | up | 208075_s_at | CCL7     | 9.41     | up |             |        |       |    |
| 201041_s_at | DUSP1                      | 5.27 | up | 209342_s_at | IKBKB    | 9.62     | up |             |        |       |    |
| 203617_x_at | ELK1                       | 5.32 | up | 205580_s_at | HRH1     | 11.03    | up |             |        |       |    |
| 201083_s_at | BCLAF1                     | 5.38 | up | 216248_s_at | NR4A2    | 22.89    | up |             |        |       |    |
| 200806_s_at | HSPD1                      | 5.39 | up | 204622_x_at | NR4A2    | 23.69    | up |             |        |       |    |
| 200787_s_at | PEA15                      | 5.40 | up | 204621_s_at | NR4A2    | 24.11023 | up |             |        |       |    |
| 200667_at   | UBE2D3                     | 5.47 | up | 207123_s_at | MATN4    | 7-.12659 | up |             |        |       |    |
| 220630_s_at | CHIA                       | 5.47 | up |             |          |          |    |             |        |       |    |
| 200640_at   | YWHAZ                      | 5.48 | up |             |          |          |    |             |        |       |    |
| 222343_at   | BCL2L11                    | 5.50 | up |             |          |          |    |             |        |       |    |
| 221097_s_at | KCNMB2                     | 5.50 | up |             |          |          |    |             |        |       |    |

|             |                         |      |    |
|-------------|-------------------------|------|----|
| 221342_at   | C6orf25                 | 5.56 | up |
| 200601_at   | ACTN4                   | 5.58 | up |
| 36004_at    | IKBKG                   | 5.59 | up |
| 200799_at   | HSPA1A<br>///<br>HSPA1B | 5.61 | up |
| 221563_at   | DUSP10                  | 5.63 | up |
| 35617_at    | MAPK7                   | 5.63 | up |
| 32029_at    | PDPK1                   | 5.64 | up |
| 221690_s_at | NLRP2                   | 5.67 | up |
| 32699_s_at  | PVR                     | 5.68 | up |
| 200639_s_at | YWHAZ                   | 5.70 | up |
| 200878_at   | EPAS1                   | 5.75 | up |
| 32128_at    | CCL18                   | 5.79 | up |
| 200788_s_at | PEA15                   | 5.79 | up |
| 200602_at   | APP                     | 5.80 | up |
| 200632_s_at | NDRG1                   | 5.82 | up |
| 200609_s_at | WDR1                    | 5.83 | up |
| 221583_s_at | KCNMA1                  | 5.89 | up |
| 220626_at   | SERPINA<br>10           | 5.93 | up |
| 200756_x_at | CALU                    | 5.93 | up |
| 200743_s_at | TPP1                    | 5.97 | up |
| 200957_s_at | SSRP1                   | 5.99 | up |
| 221284_s_at | SRC                     | 6.01 | up |
| 221584_s_at | KCNMA1                  | 6.04 | up |
| 200621_at   | CSRP1                   | 6.05 | up |
| 203664_s_at | POLR2D                  | 6.06 | up |

|             |                              |      |    |
|-------------|------------------------------|------|----|
| 203666_at   | CXCL12                       | 6.09 | up |
| 201490_s_at | PPIF                         | 6.11 | up |
| 221049_s_at | POLL                         | 6.11 | up |
| 36019_at    | STK19                        | 6.24 | up |
| 220558_x_at | TSPAN32                      | 6.32 | up |
| 220955_x_at | RAB23                        | 6.37 | up |
| 201108_s_at | THBS1                        | 6.40 | up |
|             | BLOC1S5-<br>TXNDC5<br>///    |      |    |
| 221253_s_at | TXNDC5                       | 6.42 | up |
| 221232_s_at | ANKRD2                       | 6.43 | up |
|             | EGLN2 ///<br>RAB4B-<br>EGLN2 |      |    |
| 220956_s_at | EGLN2                        | 6.45 | up |
| 200965_s_at | ABLIM1                       | 6.49 | up |
| 201146_at   | NFE2L2                       | 6.52 | up |
| 201499_s_at | USP7                         | 6.54 | up |
| 201493_s_at | PUM2                         | 6.79 | up |
| 222242_s_at | KLK5                         | 6.79 | up |
| 221691_x_at | NPM1                         | 6.82 | up |
| 200811_at   | CIRBP                        | 6.86 | up |
| 200658_s_at | PHB                          | 7.02 | up |
| 201069_at   | MMP2                         | 7.63 | up |
|             | APOLD1<br>/// DDX47          |      |    |
| 220890_s_at | /// DDX47                    | 7.78 | up |
| 221824_s_at | MARCH8                       | 7.92 | up |
| 203685_at   | BCL2                         | 8.20 | up |
| 201143_s_at | EIF2S1                       | 8.73 | up |



|             |       |      |    |
|-------------|-------|------|----|
| 201119_s_at | COX8A | 8.87 | up |
| 221679_s_at | ABHD6 | 8.91 | up |
| 201125_s_at | ITGB5 | 9.24 | up |
| 221898_at   | PDPN  | 9.58 | up |

*(up)—overexpression in comparison to the control; (down)—downregulated in comparison to the control;*

C—control; H\_12. H\_24. H\_48—periods of exposure to cisplatin
