# Supplementary material for: Expression Profile of mRNAs and miRNAs Related to the Oxidative-Stress Phenomenon in the Ishikawa Cell Line Treated Either Cisplatin or Salinomycin
Source: MDPI journal article supplement (doi:10.3390/biomedicines10051190), 2022-05-20
Supplement: s1 [file s1]

**Table S2.** List of all the mRNAs (significantly differentiated;  $p < 0.05$ ) cell culture treated with salinomycin in comparison to a control culture.

| H_12 vs C   |                     |             |         | H_24 vs C |        |             |         | H_48 vs C   |                                                                                                                         |             |         |
|-------------|---------------------|-------------|---------|-----------|--------|-------------|---------|-------------|-------------------------------------------------------------------------------------------------------------------------|-------------|---------|
| ID          | Gene                | Fold Change | up/down | ID        | Gene   | Fold Change | up/down | ID          | Gene                                                                                                                    | Fold Change | up/down |
| 211688_x_at | KIR3DL1 /// KIR3DL2 | -9.30       | down    | 205937_at | CGREF1 | -17.89      | down    | 207746_at   | POLQ                                                                                                                    | -8.64       | down    |
| 212006_at   | UBXN4               | -8.79       | down    | 205945_at | IL6R   | -17.13      | down    | 207542_s_at | AQP1                                                                                                                    | -6.62       | down    |
| 202535_at   | FADD                | -8.51       | down    | 205938_at | PPM1E  | -16.89      | down    | 207774_at   | ATG10                                                                                                                   | -6.61       | down    |
| 211828_s_at | TNIK                | -7.76       | down    | 205916_at | S100A7 | -9.12       | down    | 207739_s_at | GAGE1 ///<br>GAGE1 2D ///<br>GAGE1 2F ///<br>GAGE1 2G ///<br>GAGE1 2I ///<br>GAGE1 2J ///<br>GAGE1 3 ///<br>GAGE2 A /// | -6.04       | down    |

|                     |             |       |      |                     |                  |       |      |                 |                                                                                                                                                               |       |      |
|---------------------|-------------|-------|------|---------------------|------------------|-------|------|-----------------|---------------------------------------------------------------------------------------------------------------------------------------------------------------|-------|------|
|                     |             |       |      |                     |                  |       |      |                 | GAGE2<br>B ///<br>GAGE2<br>C ///<br>GAGE2<br>D ///<br>GAGE2<br>E ///<br>GAGE3<br>///<br>GAGE4<br>///<br>GAGE5<br>///<br>GAGE6<br>///<br>GAGE7<br>///<br>GAGE8 |       |      |
| 2024<br>35_s<br>_at | CYP1B1      | -7.13 | down | 2059<br>05_s<br>_at | MICA ///<br>MICB | -7.70 | down | 207952_at       | IL5                                                                                                                                                           | -5.93 | down |
| 2024<br>67_s<br>_at | COPS2       | -6.23 | down | 2056<br>72_at       | XPA              | -6.79 | down | 207727_s_a<br>t | MUTY<br>H                                                                                                                                                     | -5.89 | down |
| 2025<br>13_s<br>_at | PPP2R5<br>D | -6.21 | down | 2075<br>74_s<br>_at | GADD45<br>B      | -6.13 | down | 210372_s_a<br>t | TPD52L<br>1                                                                                                                                                   | -5.88 | down |
| 2116<br>07_x<br>_at | EGFR        | -6.15 | down | 2078<br>10_at       | F13B             | -5.94 | down | 207957_s_a<br>t | PRKCB                                                                                                                                                         | -5.69 | down |

|                     |                             |       |      |                     |                     |       |      |                 |              |       |      |
|---------------------|-----------------------------|-------|------|---------------------|---------------------|-------|------|-----------------|--------------|-------|------|
| 2025<br>03_s<br>_at | KIAA01<br>01                | -6.15 | down | 2076<br>43_s<br>_at | TNFRSF1<br>A        | -5.66 | down | 207966_s_a<br>t | GLG1         | -5.69 | down |
| 2118<br>83_x<br>_at | CEACA<br>M1                 | -5.93 | down | 2059<br>04_at       | MICA                | -5.60 | down | 207940_x_a<br>t | CNR1         | -5.68 | down |
| 2024<br>51_a<br>t   | GTF2H<br>1                  | -5.51 | down | 2059<br>19_at       | HBE1                | -4.88 | down | 207723_s_a<br>t | KLRC3        | -5.62 | down |
| 2120<br>08_a<br>t   | UBXN4                       | -5.37 | down | 2056<br>81_at       | BCL2A1              | -4.53 | down | 207769_s_a<br>t | PQBP1        | -5.60 | down |
| 2060<br>49_a<br>t   | SELP                        | -5.18 | down | 2212<br>71_at       | IL21                | -4.47 | down | 207967_at       | VPS45        | -5.60 | down |
| 2116<br>87_x<br>_at | KIR3DL<br>1                 | -4.89 | down | 2056<br>83_x<br>_at | TPSAB1<br>/// TPSB2 | -4.29 | down | 207714_s_a<br>t | SERPIN<br>H1 | -5.55 | down |
| 2060<br>44_s<br>_at | BRAF<br>///<br>KIAA15<br>49 | -4.72 | down | 2076<br>07_at       | ASCL2               | -4.23 | down | 207968_s_a<br>t | MEF2C        | -5.41 | down |
| 2025<br>05_a<br>t   | SNRPB<br>2                  | -4.54 | down | 2057<br>29_at       | OSMR                | -4.15 | down | 207979_s_a<br>t | CD8B         | -5.26 | down |
| 2116<br>92_s<br>_at | BBC3                        | -4.36 | down | 2076<br>08_x<br>_at | CYP1A2              | -4.11 | down | 207964_x_a<br>t | IFNA4        | -4.69 | down |
| 2116<br>11_s<br>_at | ATF6B<br>///<br>TNXB        | -4.13 | down | 2056<br>85_at       | CD86                | -3.99 | down | 210288_at       | KLRG1        | -4.53 | down |

|                     |             |       |      |                     |             |       |      |                 |             |       |      |
|---------------------|-------------|-------|------|---------------------|-------------|-------|------|-----------------|-------------|-------|------|
| 2060<br>51_a<br>t   | ELAVL<br>4  | -4.06 | down | 2058<br>85_s<br>_at | ITGA4       | -3.68 | down | 207741_x_a<br>t | TPSAB1      | -4.32 | down |
| 2024<br>66_a<br>t   | PAPD7       | -4.06 | down | 2076<br>26_s<br>_at | SLC7A2      | -3.66 | down | 210373_at       | NPRL2       | -3.50 | down |
| 2060<br>64_s<br>_at | PPIL2       | -3.82 | down | 2058<br>92_s<br>_at | FABP1       | -3.65 | down | 207974_s_a<br>t | SKP1        | -3.48 | down |
| 2118<br>31_s<br>_at | THPO        | -3.65 | down | 2076<br>29_s<br>_at | ARHGEF<br>2 | -3.53 | down | 210244_at       | CAMP        | -3.44 | down |
| 2024<br>37_s<br>_at | CYP1B1      | -3.47 | down | 2057<br>07_at       | IL17RA      | -3.51 | down | 210374_x_a<br>t | PTGER<br>3  | -3.39 | down |
| 2116<br>95_x<br>_at | MUC1        | -3.45 | down | 2076<br>17_at       | DDX3X       | -3.35 | down | 210271_at       | NEURO<br>D2 | -3.33 | down |
| 2024<br>36_s<br>_at | CYP1B1      | -3.43 | down | 2057<br>08_s<br>_at | TRPM2       | -3.22 | down | 210250_x_a<br>t | ADSL        | -3.19 | down |
| 2118<br>89_x<br>_at | CEACA<br>M1 | -3.36 | down | 2059<br>00_at       | KRT1        | -3.16 | down | 210241_s_a<br>t | TP53TG<br>1 | -3.16 | down |
| 2118<br>69_a<br>t   | ---         | -3.34 | down | 2056<br>92_s<br>_at | CD38        | -3.12 | down | 210255_at       | RAD51<br>B  | -2.78 | down |
| 2060<br>60_s<br>_at | PTPN22      | -3.21 | down | 2056<br>86_s<br>_at | CD86        | -2.99 | down | 210284_s_a<br>t | TAB2        | -2.74 | down |
| 2120<br>07_a<br>t   | UBXN4       | -3.19 | down | 2078<br>04_s<br>_at | FCN2        | -2.91 | down | 207548_at       | GRM7        | -2.72 | down |

|                     |                                        |       |      |                     |             |       |      |                 |              |       |      |
|---------------------|----------------------------------------|-------|------|---------------------|-------------|-------|------|-----------------|--------------|-------|------|
| 2118<br>90_x<br>_at | CAPN3                                  | -3.16 | down | 2058<br>98_at       | CX3CR1      | -2.83 | down | 210260_s_a<br>t | TNFAI<br>P8  | -2.42 | down |
| 2024<br>34_s<br>_at | CYP1B1                                 | -3.13 | down | 2075<br>98_x<br>_at | XRCC2       | -2.75 | down | 207709_at       | PRKAA<br>2   | -2.42 | down |
| 2118<br>97_s<br>_at | CRHR1<br>///<br>MGC57<br>346-<br>CRHR1 | -3.12 | down | 2076<br>45_s<br>_at | CHD1L       | -2.71 | down | 210362_x_a<br>t | PML          | -2.34 | down |
| 2118<br>93_x<br>_at | CD6                                    | -2.98 | down | 2078<br>08_s<br>_at | PROS1       | -2.57 | down | 210367_s_a<br>t | PTGES        | -2.34 | down |
| 2024<br>55_a<br>t   | HDAC5                                  | -2.97 | down | 2058<br>87_x<br>_at | MSH3        | -2.42 | down | 210360_s_a<br>t | MTSS1        | -2.10 | down |
| 2025<br>49_a<br>t   | VAPB                                   | -2.97 | down | 2076<br>14_s<br>_at | CUL1        | -2.28 | down | 210257_x_a<br>t | CUL4B        | -2.08 | down |
| 2025<br>45_a<br>t   | PRKCD                                  | -2.95 | down | 2058<br>91_at       | ADORA2<br>B | -2.27 | down | 210242_x_a<br>t | ST20         | -2.07 | down |
| 2024<br>57_s<br>_at | PPP3C<br>A                             | -2.88 | down | 2059<br>28_at       | ZNF443      | -2.11 | down | 208046_at       | HIST1H<br>4A | 2.02  | up   |
| 2116<br>05_s<br>_at | RARA                                   | -2.67 | down | 2076<br>16_s<br>_at | TANK        | -2.08 | down | 207668_x_a<br>t | PDIA6        | 2.14  | up   |
| 2120<br>09_s<br>_at | STIP1                                  | -2.64 | down | 2058<br>59_at       | LY86        | 1.74  | up   | 207686_s_a<br>t | CASP8        | 2.18  | up   |

|                     |                             |       |      |                     |        |      |    |                  |            |      |    |
|---------------------|-----------------------------|-------|------|---------------------|--------|------|----|------------------|------------|------|----|
| 2060<br>63_x<br>_at | PPIL2                       | -2.59 | down | 2058<br>38_at       | GYPA   | 2.02 | up | 210236_at        | PPFIA1     | 2.23 | up |
| 2025<br>30_a<br>_t  | MAPK1<br>4                  | -2.56 | down | 2078<br>44_at       | IL13   | 2.04 | up | 207691_x_a<br>_t | ENTPD<br>1 | 2.25 | up |
| 2060<br>54_a<br>_t  | KNG1                        | -2.53 | down | 2078<br>57_at       | LILRA2 | 2.07 | up | 210359_at        | MTSS1      | 2.25 | up |
| 2060<br>57_x<br>_at | LOC105<br>369261<br>/// SPN | -2.52 | down | 2078<br>14_at       | DEFA6  | 2.08 | up | 207655_s_a<br>_t | BLNK       | 2.38 | up |
| 2025<br>50_s<br>_at | VAPB                        | -2.50 | down | 2058<br>58_at       | NGFR   | 2.11 | up | 210235_s_a<br>_t | PPFIA1     | 2.53 | up |
| 2119<br>00_x<br>_at | CD6                         | -2.48 | down | 2075<br>66_at       | MR1    | 2.14 | up | 210383_at        | SCN1A      | 2.54 | up |
| 2024<br>53_s<br>_at | GTF2H<br>1                  | -2.27 | down | 2058<br>66_at       | FCN3   | 2.22 | up | 210339_s_a<br>_t | KLK2       | 2.61 | up |
| 2060<br>56_x<br>_at | LOC105<br>369261<br>/// SPN | -2.02 | down | 2078<br>15_at       | PF4V1  | 2.22 | up | 210309_at        | RECQL<br>5 | 2.85 | up |
| 2116<br>10_a<br>_t  | KLF6                        | -1.90 | down | 2057<br>74_at       | F12    | 2.39 | up | 210240_s_a<br>_t | CDKN2<br>D | 2.92 | up |
| 2025<br>00_a<br>_t  | DNAJB<br>2                  | -1.85 | down | 2057<br>70_at       | GSR    | 2.41 | up | 202859_x_a<br>_t | CXCL8      | 3.00 | up |
| 2117<br>44_s<br>_at | CD58                        | 1.82  | up   | 2058<br>37_s<br>_at | GYPA   | 2.48 | up | 208038_at        | IL1RL2     | 3.05 | up |

|                     |             |      |    |                     |            |      |    |                 |             |      |    |
|---------------------|-------------|------|----|---------------------|------------|------|----|-----------------|-------------|------|----|
| 2117<br>63_s<br>_at | UBE2B       | 2.03 | up | 2078<br>17_at       | IFNW1      | 2.57 | up | 207902_at       | IL5RA       | 3.09 | up |
| 2118<br>04_s<br>_at | CDK2        | 2.06 | up | 2076<br>13_s<br>_at | CAMK2<br>A | 2.59 | up | 207901_at       | IL12B       | 3.10 | up |
| 2026<br>37_s<br>_at | ICAM1       | 2.06 | up | 2076<br>09_s<br>_at | CYP1A2     | 2.64 | up | 211506_s_a<br>t | CXCL8       | 3.21 | up |
| 2026<br>07_a<br>t   | NDST1       | 2.11 | up | 2056<br>30_at       | CRH        | 2.76 | up | 210379_s_a<br>t | TLK1        | 3.22 | up |
| 2060<br>26_s<br>_at | TNFAI<br>P6 | 2.14 | up | 2056<br>24_at       | CPA3       | 2.83 | up | 208022_s_a<br>t | CDC14<br>B  | 3.23 | up |
| 2060<br>25_s<br>_at | TNFAI<br>P6 | 2.21 | up | 2058<br>63_at       | S100A12    | 2.83 | up | 207795_s_a<br>t | KLRD1       | 3.39 | up |
| 2025<br>58_s<br>_at | HSPA1<br>3  | 2.22 | up | 2075<br>71_x<br>_at | THEMIS2    | 2.88 | up | 208010_s_a<br>t | PTPN22      | 3.51 | up |
| 2024<br>50_s<br>_at | CTSK        | 2.27 | up | 2078<br>40_at       | CD160      | 2.93 | up | 210208_x_a<br>t | BAG6        | 3.59 | up |
| 2026<br>06_s<br>_at | TLK1        | 2.31 | up | 2056<br>20_at       | F10        | 2.97 | up | 207995_s_a<br>t | CLEC4<br>M  | 3.59 | up |
| 2118<br>20_x<br>_at | GYPA        | 2.36 | up | 2056<br>50_s<br>_at | FGA        | 2.98 | up | 208023_at       | TNFRS<br>F4 | 3.71 | up |
| 2117<br>88_s<br>_at | TREX2       | 2.39 | up | 2056<br>47_at       | RAD52      | 3.07 | up | 207788_s_a<br>t | SORBS3      | 3.87 | up |

|             |                       |      |    |             |        |      |    |             |          |      |    |
|-------------|-----------------------|------|----|-------------|--------|------|----|-------------|----------|------|----|
| 202555_s_at | MYLK                  | 2.40 | up | 207821_s_at | PTK2   | 3.09 | up | 208018_s_at | HCK      | 4.07 | up |
| 211732_x_at | HNMT                  | 2.41 | up | 205841_at   | JAK2   | 3.09 | up | 208003_s_at | NFAT5    | 4.08 | up |
| 211945_s_at | ITGB1                 | 2.42 | up | 205749_at   | CYP1A1 | 3.15 | up | 210342_s_at | TPO      | 4.31 | up |
| 211624_s_at | DRD2                  | 2.49 | up | 207827_x_at | SNCA   | 3.15 | up | 208026_at   | HIST1H4F | 4.50 | up |
| 202608_s_at | NDST1                 | 2.50 | up | 205654_at   | C4BPA  | 3.22 | up | 210211_s_at | HSP90AA1 | 4.68 | up |
| 211711_s_at | PTEN                  | 2.51 | up | 205667_at   | WRN    | 3.39 | up | 207554_x_at | TBXA2R   | 5.18 | up |
| 202617_s_at | IRAK1<br>///<br>MECP2 | 2.51 | up | 205786_s_at | ITGAM  | 3.42 | up | 207994_s_at | OPRM1    | 5.33 | up |
| 202444_s_at | ERLIN1                | 2.54 | up | 207565_s_at | MR1    | 3.42 | up | 208028_s_at | GPX5     | 5.34 | up |
| 211652_s_at | LBP                   | 2.66 | up | 205746_s_at | ADAM17 | 3.44 | up | 207989_at   | OPRM1    | 5.41 | up |
| 211783_s_at | MTA1                  | 2.70 | up | 205819_at   | MARCO  | 3.44 | up | 207798_s_at | ATXN2L   | 5.42 | up |
| 211696_x_at | HBB                   | 2.75 | up | 205750_at   | BPHL   | 3.47 | up | 207872_s_at | LILRA1   | 5.43 | up |



|                     |                     |      |    |                     |             |      |    |                  |            |      |    |
|---------------------|---------------------|------|----|---------------------|-------------|------|----|------------------|------------|------|----|
| 2024<br>41_a<br>_t  | ERLIN1              | 2.84 | up | 2057<br>45_x<br>_at | ADAM17      | 3.64 | up | 210198_s_a<br>_t | PLP1       | 5.46 | up |
| 2116<br>58_a<br>_t  | PRDX2               | 2.89 | up | 2058<br>67_at       | PTPN11      | 3.65 | up | 207890_s_a<br>_t | MMP25      | 5.47 | up |
| 2116<br>57_a<br>_t  | CEACA<br>M6         | 2.90 | up | 2056<br>40_at       | ALDH3B<br>1 | 3.71 | up | 207892_at        | CD40L<br>G | 5.59 | up |
| 2117<br>62_s<br>_at | KPNA2               | 2.91 | up | 2080<br>75_s<br>_at | CCL7        | 3.75 | up | 207802_at        | CRISP3     | 5.60 | up |
| 2119<br>28_a<br>_t  | DYNC1<br>H1         | 3.07 | up | 2078<br>47_s<br>_at | MUC1        | 3.76 | up | 207932_at        | IFNA8      | 5.61 | up |
| 2117<br>28_s<br>_at | HYAL3               | 3.15 | up | 2056<br>66_at       | FMO1        | 3.77 | up | 207919_at        | ART1       | 5.61 | up |
| 2025<br>56_s<br>_at | MCRS1               | 3.17 | up | 2056<br>23_at       | ALDH3A<br>1 | 3.77 | up | 207860_at        | NCR1       | 5.62 | up |
| 2116<br>99_x<br>_at | HBA1<br>///<br>HBA2 | 3.17 | up | 2056<br>21_at       | ALKBH1      | 3.78 | up | 200833_s_a<br>_t | RAP1B      | 5.65 | up |
| 2025<br>53_s<br>_at | SYF2                | 3.19 | up | 2058<br>44_at       | 1.00 VNN    | 3.82 | up | 207980_s_a<br>_t | CITED2     | 5.67 | up |
| 2075<br>28_s<br>_at | SLC7A1<br>1         | 3.25 | up | 2056<br>49_s<br>_at | FGA         | 3.82 | up | 207861_at        | CCL22      | 5.68 | up |
| 2117<br>06_s<br>_at | CDK19               | 3.33 | up | 2056<br>68_at       | LY75        | 3.88 | up | 210376_x_a<br>_t | ELK1       | 5.73 | up |

|             |         |      |    |             |        |      |    |             |        |      |    |
|-------------|---------|------|----|-------------|--------|------|----|-------------|--------|------|----|
| 202638_s_at | ICAM1   | 3.38 | up | 205827_at   | CCK    | 3.88 | up | 207926_at   | GP5    | 5.84 | up |
| 211719_x_at | FN1     | 3.41 | up | 205743_at   | STAC   | 3.99 | up | 207900_at   | CCL17  | 5.95 | up |
| 209921_at   | SLC7A11 | 3.41 | up | 205766_at   | TCAP   | 4.02 | up | 210233_at   | IL1RAP | 6.15 | up |
| 202616_s_at | MECP2   | 3.45 | up | 205753_at   | CRP    | 4.02 | up | 208000_at   | GML    | 6.35 | up |
| 211661_x_at | PTAFR   | 3.48 | up | 205639_at   | AOAH   | 4.03 | up | 208034_s_at | PROZ   | 6.47 | up |
| 211851_x_at | BRCA1   | 3.50 | up | 205660_at   | OASL   | 4.08 | up | 210375_at   | PTGER3 | 6.51 | up |
| 202557_at   | HSPA13  | 3.51 | up | 205884_at   | ITGA4  | 4.22 | up | 207796_x_at | KLRD1  | 6.57 | up |
| 211956_s_at | EIF1    | 3.52 | up | 205842_s_at | JAK2   | 4.25 | up | 207539_s_at | IL4    | 6.79 | up |
| 211741_x_at | PSG3    | 3.61 | up | 205782_at   | FGF7   | 4.31 | up | 210216_x_at | RAD1   | 7.05 | up |
| 211805_s_at | SLC8A1  | 3.65 | up | 207610_s_at | ADGRE2 | 4.34 | up | 207777_s_at | SP140  | 7.27 | up |
| 202618_s_at | MECP2   | 3.74 | up | 205779_at   | RAMP2  | 4.42 | up | 207550_at   | MPL    | 8.16 | up |

|                     |                                                                                                                       |      |    |                     |             |      |    |                  |             |       |    |
|---------------------|-----------------------------------------------------------------------------------------------------------------------|------|----|---------------------|-------------|------|----|------------------|-------------|-------|----|
| 2118<br>03_a<br>_t  | CDK2                                                                                                                  | 3.75 | up | 2056<br>51_x<br>_at | RAPGEF<br>4 | 4.42 | up | 210224_at        | MR1         | 8.32  | up |
| 2119<br>26_s<br>_at | MYH9                                                                                                                  | 3.79 | up | 2078<br>50_at       | CXCL3       | 4.44 | up | 207782_s_a<br>_t | PSEN1       | 9.25  | up |
| 2117<br>96_s<br>_at | TRBC1<br>///<br>TRBC2<br>///<br>TRBV19<br>///<br>TRBV3-<br>1 ///<br>TRBV5-<br>4 ///<br>TRBV6-<br>5 ///<br>TRBV7-<br>2 | 3.79 | up | 2058<br>20_s<br>_at | APOC3       | 4.55 | up | 210223_s_a<br>_t | MR1         | 9.50  | up |
| 2025<br>81_a<br>_t  | HSPA1<br>A ///<br>HSPA1<br>B                                                                                          | 3.81 | up | 2057<br>54_at       | F2          | 4.55 | up | 207783_x_a<br>_t | HUWE<br>1   | 13.03 | up |
| 2117<br>34_s<br>_at | FCER1<br>A                                                                                                            | 3.86 | up | 2057<br>30_s<br>_at | ABLIM3      | 4.59 | up | 207555_s_a<br>_t | TBXA2<br>R  | 13.95 | up |
| 2119<br>05_s<br>_at | ITGB4                                                                                                                 | 3.87 | up | 2058<br>80_at       | PRKD1       | 4.72 | up | 207536_s_a<br>_t | TNFRS<br>F9 | 15.23 | up |
| 2119<br>03_s<br>_at | MPL                                                                                                                   | 3.90 | up | 2078<br>16_at       | LALBA       | 4.76 | up | 204621_s_a<br>_t | NR4A2       | 15.45 | up |

|                     |              |      |    |                     |         |      |    |                 |       |       |    |
|---------------------|--------------|------|----|---------------------|---------|------|----|-----------------|-------|-------|----|
| 2119<br>78_x<br>_at | PPIA         | 3.91 | up | 2056<br>64_at       | KIN     | 4.90 | up | 207538_at       | IL4   | 15.82 | up |
| 2154<br>85_s<br>_at | ICAM1        | 3.99 | up | 2057<br>56_s<br>_at | F8      | 5.04 | up | 202859_x_a<br>t | CXCL8 | 15.88 | up |
| 2118<br>65_s<br>_at | FZR1         | 4.06 | up | 2057<br>60_s<br>_at | OGG1    | 5.11 | up | 207535_s_a<br>t | NFKB2 | 15.94 | up |
| 2119<br>36_a<br>t   | HSPA5        | 4.08 | up | 2075<br>57_s<br>_at | RYR2    | 5.12 | up | 204622_x_a<br>t | NR4A2 | 15.96 | up |
| 2119<br>68_s<br>_at | HSP90<br>AA1 | 4.09 | up | 2078<br>52_at       | CXCL5   | 5.31 | up | 216248_s_a<br>t | NR4A2 | 16.01 | up |
| 2026<br>20_s<br>_at | PLOD2        | 4.12 | up | 2058<br>24_at       | HSPB2   | 5.35 | up |                 |       |       |    |
| 2118<br>52_s<br>_at | ATRN         | 4.12 | up | 2078<br>58_s<br>_at | PKLR    | 5.42 | up |                 |       |       |    |
| 2060<br>39_a<br>t   | RAB33<br>A   | 4.14 | up | 2058<br>70_at       | BDKRB2  | 5.64 | up |                 |       |       |    |
| 2117<br>67_a<br>t   | GIN54        | 4.16 | up | 2058<br>15_at       | REG3A   | 5.80 | up |                 |       |       |    |
| 2118<br>21_x<br>_at | GYPA         | 4.21 | up | 2057<br>33_at       | BLM     | 6.06 | up |                 |       |       |    |
| 2117<br>24_x<br>_at | MIOS         | 4.37 | up | 2058<br>57_at       | SLC18A2 | 6.15 | up |                 |       |       |    |

|                     |                     |      |    |                     |                                 |       |    |
|---------------------|---------------------|------|----|---------------------|---------------------------------|-------|----|
| 2117<br>86_a<br>t   | TNFRS<br>F9         | 4.37 | up | 2058<br>79_x<br>_at | RET                             | 6.42  | up |
| 2117<br>64_s<br>_at | UBE2D<br>1          | 4.42 | up | 2058<br>31_at       | CD2                             | 6.99  | up |
| 2117<br>43_s<br>_at | PRG2                | 4.46 | up | 2057<br>78_at       | KLK7                            | 7.03  | up |
| 2116<br>68_s<br>_at | PLAU                | 4.53 | up | 2075<br>56_s<br>_at | DGKZ                            | 7.05  | up |
| 2118<br>56_x<br>_at | CD28                | 4.57 | up | 2056<br>29_s<br>_at | CRH                             | 8.04  | up |
| 2117<br>45_x<br>_at | HBA1<br>///<br>HBA2 | 4.78 | up | 2058<br>21_at       | KLRC4-<br>KLRK1<br>///<br>KLRK1 | 9.29  | up |
| 2118<br>41_s<br>_at | TNFRS<br>F25        | 4.89 | up | 2059<br>70_at       | MT3                             | 9.53  | up |
| 2026<br>19_s<br>_at | PLOD2               | 4.93 | up | 2059<br>67_at       | HIST1H4<br>C                    | 10.02 | up |
| 2118<br>19_s<br>_at | SORBS1              | 4.96 | up | 2058<br>68_s<br>_at | PTPN11                          | 10.37 | up |
| 2119<br>69_a<br>t   | HSP90<br>AA1        | 5.01 | up | 2059<br>88_at       | CD84                            | 12.03 | up |

|                     |              |      |    |                     |       |       |    |
|---------------------|--------------|------|----|---------------------|-------|-------|----|
| 2118<br>33_s<br>_at | BAX          | 5.08 | up | 2059<br>92_s<br>_at | IL15  | 13.11 | up |
| 2119<br>22_s<br>_at | CAT          | 5.09 | up | 2059<br>77_s<br>_at | EPHA1 | 14.20 | up |
| 2119<br>09_x<br>_at | PTGER<br>3   | 5.20 | up | 2060<br>01_at       | NPY   | 14.31 | up |
| 2117<br>66_s<br>_at | PNLIPR<br>P2 | 5.35 | up | 2060<br>09_at       | ITGA9 | 14.66 | up |
| 2119<br>19_s<br>_at | CXCR4        | 5.39 | up | 2059<br>62_at       | PAK2  | 16.04 | up |
| 2116<br>30_s<br>_at | GSS          | 5.44 | up | 2060<br>11_at       | CASP1 | 16.20 | up |
| 2060<br>40_s<br>_at | MAPK1<br>1   | 6.00 | up | 2059<br>78_at       | KL    | 16.28 | up |
| 2116<br>31_x<br>_at | B4GAL<br>T1  | 6.02 | up | 2059<br>84_at       | CRHBP | 16.45 | up |
| 2026<br>14_a<br>t   | SLC30A<br>9  | 6.15 | up | 2059<br>61_s<br>_at | PSIP1 | 16.50 | up |
| 2117<br>69_x<br>_at | SERIN<br>C3  | 6.15 | up | 2059<br>60_at       | PDK4  | 16.67 | up |
| 2116<br>76_s<br>_at | IFNGR1       | 6.85 | up | 2059<br>59_at       | MMP13 | 16.78 | up |

|                     |              |       |    |                     |        |       |    |
|---------------------|--------------|-------|----|---------------------|--------|-------|----|
| 2118<br>23_s<br>_at | PXN          | 7.02  | up | 2060<br>20_at       | SOCS6  | 16.84 | up |
| 2118<br>61_x<br>_at | CD28         | 7.28  | up | 2060<br>12_at       | LEFTY2 | 17.66 | up |
| 2118<br>39_s<br>_at | CSF1         | 7.35  | up | 2050<br>27_s<br>_at | MAP3K8 | 27.14 | up |
| 2117<br>13_x<br>_at | KIAA01<br>01 | 7.38  | up |                     |        |       |    |
| 2118<br>64_s<br>_at | MYOF         | 7.60  | up |                     |        |       |    |
| 2117<br>05_s<br>_at | SORBS1       | 7.93  | up |                     |        |       |    |
| 2117<br>65_x<br>_at | PPIA         | 8.42  | up |                     |        |       |    |
| 2119<br>20_a<br>t   | CFB          | 11.18 | up |                     |        |       |    |
| 2119<br>04_x<br>_at | RAD52        | 12.54 | up |                     |        |       |    |

(up)—overexpression in comparison to the control; (down)—downregulated in comparison to the control;

C—control; H\_12. H\_24. H\_48—periods of exposure to salinomycin
